# Supplementary material
Source: PubMed Central journal article supplement (PMC10789486)
Supplement: NIHMS1898858-supplement-2.pdf [file NIHMS1898858-supplement-2.pdf]

**eTable 1. Genes included in the neurodevelopmental, cardiovascular, and immunodeficiency targeted gene panels used in the NYCKidSeq study**

| Neurodevelopmental    | Cardiovascular       | Immunodeficiency     |
|-----------------------|----------------------|----------------------|
| A2ML1* (HGNC:23336)   | A2ML1* (HGNC:23336)  | ACD (HGNC:25070)     |
| ABAT (HGNC:23)        | ABCC9 (HGNC:60)      | ACP5 (HGNC:124)      |
| ABCD1 (HGNC:61)       | ACADVL (HGNC:92)     | ADA (HGNC:186)       |
| ACSL4 (HGNC:3571)     | ACTA2 (HGNC:130)     | ADA2 (HGNC:1839)     |
| ACTB (HGNC:132)       | ACTC1 (HGNC:143)     | ADAM17 (HGNC:195)    |
| ACTG1 (HGNC:144)      | ACTN2 (HGNC:164)     | ADAR (HGNC:225)      |
| ACY1 (HGNC:177)       | ACVR2B (HGNC:174)    | AICDA (HGNC:13203)   |
| ADGRG1 (HGNC:4512)    | ACVRL1 (HGNC:175)    | AIRE (HGNC:360)      |
| ADGRV1 (HGNC:17416)   | ADAMTS2 (HGNC:218)   | AK2 (HGNC:362)       |
| ADNP (HGNC:15766)     | AGK (HGNC:21869)     | AP3B1 (HGNC:566)     |
| ADSL (HGNC:291)       | AGL (HGNC:321)       | B2M (HGNC:914)       |
| AFF2 (HGNC:3776)      | AKAP9 (HGNC:379)     | BTK (HGNC:1133)      |
| AGO1 (HGNC:3262)      | ALG1 (HGNC:18294)    | C1QA (HGNC:1241)     |
| AHI1 (HGNC:21575)     | ALG12 (HGNC:19358)   | C1QB (HGNC:1242)     |
| AIFM1 (HGNC:8768)     | ALMS1 (HGNC:428)     | C1QC (HGNC:1245)     |
| ALDH5A1 (HGNC:408)    | ALPK3 (HGNC:17574)   | C1S (HGNC:1247)      |
| ALDH7A1 (HGNC:877)    | ANK2 (HGNC:493)      | C2 (HGNC:1248)       |
| ALG13 (HGNC:30881)    | ANKRD1 (HGNC:15819)  | C3 (HGNC:1318)       |
| AMT (HGNC:473)        | APOB (HGNC:603)      | C4A (HGNC:1323)      |
| ANK3 (HGNC:494)       | ARSB (HGNC:714)      | C4B (HGNC:1324)      |
| ANKRD11 (HGNC:21316)  | ATP7A (HGNC:869)     | C5 (HGNC:1331)       |
| AP1S2 (HGNC:560)      | BAG3 (HGNC:939)      | C6 (HGNC:1339)       |
| AP4B1 (HGNC:572)      | BCOR (HGNC:20893)    | C7 (HGNC:1346)       |
| AP4E1 (HGNC:573)      | BMPR1B (HGNC:1077)   | C8A (HGNC:1352)      |
| AP4M1 (HGNC:574)      | BMPR2 (HGNC:1078)    | C8B (HGNC:1353)      |
| AP4S1 (HGNC:575)      | BRAF (HGNC:1097)     | C9 (HGNC:1358)       |
| ARFGEF2 (HGNC:15853)  | CACNA1C (HGNC:1390)  | CARD11 (HGNC:16393)  |
| ARHGFEF9 (HGNC:14561) | CACNA2D1 (HGNC:1399) | CARD14 (HGNC:16446)  |
| ARID1A (HGNC:11110)   | CACNB2 (HGNC:1402)   | CARD9 (HGNC:16391)   |
| ARID1B (HGNC:18040)   | CALM1 (HGNC:1442)    | CASP10 (HGNC:1500)   |
| ARX (HGNC:18060)      | CALM2 (HGNC:1445)    | CASP8 (HGNC:1509)    |
| ASPM (HGNC:19048)     | CALM3 (HGNC:1449)    | CCDC39 (HGNC:25244)  |
| ATP13A2 (HGNC:30213)  | CASQ2 (HGNC:1513)    | CCDC40 (HGNC:26090)  |
| ATP1A2 (HGNC:800)     | CAV1 (HGNC:1527)     | CD19 (HGNC:1633)     |
| ATP2A2 (HGNC:812)     | CAV3 (HGNC:1529)     | CD247 (HGNC:1677)    |
| ATP6AP2 (HGNC:18305)  | CAVIN4 (HGNC:33742)  | CD27 (HGNC:11922)    |
| ATP6V0A2 (HGNC:18481) | CBL (HGNC:1541)      | CD3D (HGNC:1673)     |
| ATP7A (HGNC:869)      | CBS (HGNC:1550)      | CD3E (HGNC:1674)     |
| ATP8A2 (HGNC:13533)   | CHD7 (HGNC:20626)    | CD3G (HGNC:1675)     |
| ATR (HGNC:882)        | CHRM2 (HGNC:1951)    | CD40 (HGNC:11919)    |
| ATRIP (HGNC:33499)    | CHST14 (HGNC:24464)  | CD40LG (HGNC:11935)  |
| ATRX (HGNC:886)       | COL1A1 (HGNC:2197)   | CD46 (HGNC:6953)     |
| AUTS2 (HGNC:14262)    | COL1A2 (HGNC:2198)   | CD59 (HGNC:1689)     |
| BCKDK (HGNC:16902)    | COL3A1 (HGNC:2201)   | CD79A (HGNC:1698)    |
| BCL11A (HGNC:13221)   | COL5A1 (HGNC:2209)   | CD79B (HGNC:1699)    |
| BCOR (HGNC:20893)     | COL5A2 (HGNC:2210)   | CD81 (HGNC:1701)     |
| BRAF (HGNC:1097)      | COX10 (HGNC:2260)    | CD8A (HGNC:1706)     |
| BRWD3 (HGNC:17342)    | COX15 (HGNC:2263)    | CEBPE (HGNC:1836)    |
| C12orf57 (HGNC:29521) | CPT2 (HGNC:2330)     | CFB (HGNC:1037)      |
| CA8 (HGNC:1382)       | CRELD1 (HGNC:14630)  | CFD (HGNC:2771)      |
| CACNA1A (HGNC:1388)   | CRYAB (HGNC:2389)    | CFH (HGNC:4883)      |
| CACNA1C (HGNC:1390)   | CSRP3 (HGNC:2472)    | CFHR1 (HGNC:4888)    |
| CACNA1H (HGNC:1395)   | CTNNA3 (HGNC:2511)   | CFHR3 (HGNC:16980)   |
| CACNA2D2 (HGNC:1400)  | DES (HGNC:2770)      | CFI (HGNC:5394)      |
| CACNB4 (HGNC:1404)    | DMD (HGNC:2928)      | CFP (HGNC:8864)      |
| CASK (HGNC:1497)      | DNAH5 (HGNC:2950)    | CHD7 (HGNC:20626)    |
| CASR (HGNC:1514)      | DOLK (HGNC:23406)    | CIITA (HGNC:7067)    |
| CBL (HGNC:1541)       | DSC2 (HGNC:3036)     | CLPB (HGNC:30664)    |
| CC2D1A (HGNC:30237)   | DSG2 (HGNC:3049)     | COPA (HGNC:2230)     |
| CCDC22 (HGNC:28909)   | DSP (HGNC:3052)      | CORO1A (HGNC:2252)   |
| CCDC88C (HGNC:19967)  | DTNA (HGNC:3057)     | CR2 (HGNC:2336)      |
| CCM2 (HGNC:21708)     | EFEMP2 (HGNC:3219)   | CSF2RA (HGNC:2435)   |
| CDK5RAP2 (HGNC:18672) | EIF2AK4 (HGNC:19687) | CSF3R (HGNC:2439)    |
| CDKL5 (HGNC:11411)    | ELAC2 (HGNC:14198)   | CTC1 (HGNC:26169)    |
| CDKN1C (HGNC:1786)    | ELN (HGNC:3327)      | CTLA4 (HGNC:2505)    |
| CDON (HGNC:17104)     | EMD (HGNC:3331)      | CTPS1 (HGNC:2519)    |
| CENPJ (HGNC:17272)    | ENG (HGNC:3349)      | CTSC (HGNC:2528)     |
| CEP135 (HGNC:29086)   | EYA4 (HGNC:3522)     | CXCR4 (HGNC:2561)    |
| CEP152 (HGNC:29298)   | FBN1 (HGNC:3603)     | CYBA (HGNC:2577)     |
| CEP63 (HGNC:25815)    | FBN2 (HGNC:3604)     | CYBB (HGNC:2578)     |
| CHD2 (HGNC:1917)      | FHL1 (HGNC:3702)     | DCLRE1B (HGNC:17641) |
| CHD7 (HGNC:20626)     | FKBP14 (HGNC:18625)  | DCLRE1C (HGNC:17642) |
| CHD8 (HGNC:20153)     | FKRP (HGNC:17997)    | DGKE (HGNC:2852)     |
| CHRNA2 (HGNC:1956)    | FKTN (HGNC:3622)     | DKC1 (HGNC:2890)     |
| CHRNA4 (HGNC:1958)    | FLNA (HGNC:3754)     | DNMT3B (HGNC:2979)   |
| CHRNA7 (HGNC:1960)    | FLNC (HGNC:3756)     | DOCK2 (HGNC:2988)    |
| CHRN2 (HGNC:1962)     | FOXH1 (HGNC:3814)    | DOCK8 (HGNC:19191)   |

the study until 8/12/2020, only CNVs were reported for SHANK2 and SHANK3. Starting on 8/13/2020, NGS technology was included for these genes.

|                             |                             |                             |
|-----------------------------|-----------------------------|-----------------------------|
| <i>CLCN2</i> (HGNC:2020)    | <i>GAA</i> (HGNC:4065)      | <i>DUOX2</i> (HGNC:13273)   |
| <i>CLCN4</i> (HGNC:2022)    | <i>GATA4</i> (HGNC:4173)    | <i>ELANE</i> (HGNC:3309)    |
| <i>CLN3</i> (HGNC:2074)     | <i>GATA6</i> (HGNC:4174)    | <i>EPCAM</i> (HGNC:11529)   |
| <i>CLN5</i> (HGNC:2076)     | <i>GATAD1</i> (HGNC:29941)  | <i>EPG5</i> (HGNC:29331)    |
| <i>CLN6</i> (HGNC:2077)     | <i>GBA</i> (HGNC:4177)      | <i>FADD</i> (HGNC:3573)     |
| <i>CLN8</i> (HGNC:2079)     | <i>GBE1</i> (HGNC:4180)     | <i>FAS</i> (HGNC:11920)     |
| <i>CNTNAP2</i> (HGNC:13830) | <i>GDF1</i> (HGNC:4214)     | <i>FASLG</i> (HGNC:11936)   |
| <i>COL18A1</i> (HGNC:2195)  | <i>GDF2</i> (HGNC:4217)     | <i>FCN1</i> (HGNC:3623)     |
| <i>COL4A1</i> (HGNC:2202)   | <i>GJA1</i> (HGNC:4274)     | <i>FERMT1</i> (HGNC:15889)  |
| <i>CPA6</i> (HGNC:17245)    | <i>GJA5</i> (HGNC:4279)     | <i>FERMT3</i> (HGNC:23151)  |
| <i>CREBBP</i> (HGNC:2348)   | <i>GLA</i> (HGNC:4296)      | <i>FOXP1</i> (HGNC:12765)   |
| <i>CSTB</i> (HGNC:2482)     | <i>GLB1</i> (HGNC:4298)     | <i>FOXP3</i> (HGNC:6106)    |
| <i>CTCF</i> (HGNC:13723)    | <i>GPC3</i> (HGNC:4451)     | <i>G6PC3</i> (HGNC:24861)   |
| <i>CTNNB1</i> (HGNC:2514)   | <i>GPD1L</i> (HGNC:28956)   | <i>G6PD</i> (HGNC:4057)     |
| <i>CTSD</i> (HGNC:2529)     | <i>GUSB</i> (HGNC:4696)     | <i>GATA2</i> (HGNC:4171)    |
| <i>CUL3</i> (HGNC:2553)     | <i>HADHA</i> (HGNC:4801)    | <i>GATA3</i> (HGNC:4172)    |
| <i>CUL4B</i> (HGNC:2555)    | <i>HAND1</i> (HGNC:4807)    | <i>GFI1</i> (HGNC:4237)     |
| <i>CYP27A1</i> (HGNC:2605)  | <i>HCN4</i> (HGNC:16882)    | <i>GUCY2C</i> (HGNC:4688)   |
| <i>D2HGDH</i> (HGNC:28358)  | <i>HEXB</i> (HGNC:4879)     | <i>HAX1</i> (HGNC:16915)    |
| <i>DCX</i> (HGNC:2714)      | <i>HRAS</i> (HGNC:5173)     | <i>HPS1</i> (HGNC:5163)     |
| <i>DDHD2</i> (HGNC:29106)   | <i>IDUA</i> (HGNC:5391)     | <i>HPS4</i> (HGNC:15844)    |
| <i>DDX3X</i> (HGNC:2745)    | <i>ILK</i> (HGNC:6040)      | <i>HPS6</i> (HGNC:18817)    |
| <i>DEAF1</i> (HGNC:14677)   | <i>JAG1</i> (HGNC:6188)     | <i>ICOS</i> (HGNC:5351)     |
| <i>DEPDC5</i> (HGNC:18423)  | <i>JPH2</i> (HGNC:14202)    | <i>IFIH1</i> (HGNC:18873)   |
| <i>DHCR7</i> (HGNC:2860)    | <i>JUP</i> (HGNC:6207)      | <i>IFNGR1</i> (HGNC:5439)   |
| <i>DIS3L2</i> (HGNC:28648)  | <i>KCNA5</i> (HGNC:6224)    | <i>IFNGR2</i> (HGNC:5440)   |
| <i>DISP1</i> (HGNC:19711)   | <i>KCND3</i> (HGNC:6239)    | <i>IGHM</i> (HGNC:5541)     |
| <i>DKC1</i> (HGNC:2890)     | <i>KCNE1</i> (HGNC:6240)    | <i>IGLL1</i> (HGNC:5870)    |
| <i>DLG3</i> (HGNC:2902)     | <i>KCNE2</i> (HGNC:6242)    | <i>IKBKB</i> (HGNC:5960)    |
| <i>DLL1</i> (HGNC:2908)     | <i>KCNE3</i> (HGNC:6243)    | <i>IKBKG</i> (HGNC:5961)    |
| <i>DMD</i> (HGNC:2928)      | <i>KCNE5</i> (HGNC:6241)    | <i>IL10</i> (HGNC:5962)     |
| <i>DNAJC5</i> (HGNC:16235)  | <i>KCNH2</i> (HGNC:6251)    | <i>IL10RA</i> (HGNC:5964)   |
| <i>DNM1</i> (HGNC:2972)     | <i>KCNJ2</i> (HGNC:6263)    | <i>IL10RB</i> (HGNC:5965)   |
| <i>DNMT3A</i> (HGNC:2978)   | <i>KCNJ5</i> (HGNC:6266)    | <i>IL12B</i> (HGNC:5970)    |
| <i>DOCK7</i> (HGNC:19190)   | <i>KCNJ8</i> (HGNC:6269)    | <i>IL12RB1</i> (HGNC:5971)  |
| <i>DPYD</i> (HGNC:3012)     | <i>KCNK3</i> (HGNC:6278)    | <i>IL17F</i> (HGNC:16404)   |
| <i>DYNC1H1</i> (HGNC:2961)  | <i>KCNQ1</i> (HGNC:6294)    | <i>IL17RA</i> (HGNC:5985)   |
| <i>DYRK1A</i> (HGNC:3091)   | <i>KRAS</i> (HGNC:6407)     | <i>IL17RC</i> (HGNC:18358)  |
| <i>EBP</i> (HGNC:3133)      | <i>LAMA4</i> (HGNC:6484)    | <i>IL18</i> (HGNC:5986)     |
| <i>EEF1A2</i> (HGNC:3192)   | <i>LAMP2</i> (HGNC:6501)    | <i>IL18RAP</i> (HGNC:5989)  |
| <i>EFHC1</i> (HGNC:16406)   | <i>LDB3</i> (HGNC:15710)    | <i>IL1RN</i> (HGNC:6000)    |
| <i>EHMT1</i> (HGNC:24650)   | <i>LDLR</i> (HGNC:6547)     | <i>IL21</i> (HGNC:6005)     |
| <i>EIF2S3</i> (HGNC:3267)   | <i>LDLRAP1</i> (HGNC:18640) | <i>IL21R</i> (HGNC:6006)    |
| <i>ELP4</i> (HGNC:1171)     | <i>LEFTY2</i> (HGNC:3122)   | <i>IL23R</i> (HGNC:19100)   |
| <i>EMX2</i> (HGNC:3341)     | <i>LMNA</i> (HGNC:6636)     | <i>IL2RA</i> (HGNC:6008)    |
| <i>EP300</i> (HGNC:3373)    | <i>LZTR1</i> (HGNC:6742)    | <i>IL2RG</i> (HGNC:6010)    |
| <i>EPM2A</i> (HGNC:3413)    | <i>MAP2K1</i> (HGNC:6840)   | <i>IL36RN</i> (HGNC:15561)  |
| <i>ERCC6</i> (HGNC:3438)    | <i>MAP2K2</i> (HGNC:6842)   | <i>IL7R</i> (HGNC:6024)     |
| <i>ERCC8</i> (HGNC:3439)    | <i>MAT2A</i> (HGNC:6904)    | <i>INO80</i> (HGNC:26956)   |
| <i>EZH2</i> (HGNC:3527)     | <i>MED12</i> (HGNC:11957)   | <i>IRAK4</i> (HGNC:17967)   |
| <i>FGD1</i> (HGNC:3663)     | <i>MED13L</i> (HGNC:22962)  | <i>IRF7</i> (HGNC:6122)     |
| <i>FGF8</i> (HGNC:3686)     | <i>MEIS2</i> (HGNC:7001)    | <i>IRF8</i> (HGNC:5358)     |
| <i>FGFR3</i> (HGNC:3690)    | <i>MFAP5</i> (HGNC:29673)   | <i>IRGM</i> (HGNC:29597)    |
| <i>FKRP</i> (HGNC:17997)    | <i>MIB1</i> (HGNC:21086)    | <i>ISG15</i> (HGNC:4053)    |
| <i>FKTN</i> (HGNC:3622)     | <i>MLYCD</i> (HGNC:7150)    | <i>ITGAM</i> (HGNC:6149)    |
| <i>FLNA</i> (HGNC:3754)     | <i>MTO1</i> (HGNC:19261)    | <i>ITGB2</i> (HGNC:6155)    |
| <i>FLVCR2</i> (HGNC:20105)  | <i>MUT</i> (HGNC:7526)      | <i>ITK</i> (HGNC:6171)      |
| <i>FMR1</i> (HGNC:3775)     | <i>MYBPC3</i> (HGNC:7551)   | <i>JAGN1</i> (HGNC:26926)   |
| <i>FOLR1</i> (HGNC:3791)    | <i>MYH11</i> (HGNC:7569)    | <i>JAK1</i> (HGNC:6190)     |
| <i>FOXG1</i> (HGNC:3811)    | <i>MYH6</i> (HGNC:7576)     | <i>JAK3</i> (HGNC:6193)     |
| <i>FOXH1</i> (HGNC:3814)    | <i>MYH7</i> (HGNC:7577)     | <i>LAMTOR2</i> (HGNC:29796) |
| <i>FOXP1</i> (HGNC:3823)    | <i>MYL2</i> (HGNC:7583)     | <i>LCK</i> (HGNC:6524)      |
| <i>FOXP2</i> (HGNC:13875)   | <i>MYL3</i> (HGNC:7584)     | <i>LIG1</i> (HGNC:6598)     |
| <i>FTSJ1</i> (HGNC:13254)   | <i>MYLK</i> (HGNC:7590)     | <i>LIG4</i> (HGNC:6601)     |
| <i>GABRA1</i> (HGNC:4075)   | <i>MYLK2</i> (HGNC:16243)   | <i>LPIN2</i> (HGNC:14450)   |
| <i>GABRB2</i> (HGNC:4082)   | <i>MYOM1</i> (HGNC:7613)    | <i>LRBA</i> (HGNC:1742)     |
| <i>GABRB3</i> (HGNC:4083)   | <i>MYOZ2</i> (HGNC:1330)    | <i>LRRC8A</i> (HGNC:19027)  |
| <i>GABRD</i> (HGNC:4084)    | <i>MYPN</i> (HGNC:23246)    | <i>LYST</i> (HGNC:1968)     |
| <i>GABRG2</i> (HGNC:4087)   | <i>NDUFA10</i> (HGNC:7684)  | <i>MAGT1</i> (HGNC:28880)   |
| <i>GAMT</i> (HGNC:4136)     | <i>NDUFA12</i> (HGNC:23987) | <i>MALT1</i> (HGNC:6819)    |
| <i>GAS1</i> (HGNC:4165)     | <i>NDUFA2</i> (HGNC:7685)   | <i>MAP3K14</i> (HGNC:6853)  |
| <i>GATAD2B</i> (HGNC:30778) | <i>NDUFA9</i> (HGNC:7693)   | <i>MASP2</i> (HGNC:6902)    |
| <i>GATM</i> (HGNC:4175)     | <i>NDUFAP2</i> (HGNC:28086) | <i>MEFV</i> (HGNC:6998)     |
| <i>GCSH</i> (HGNC:4208)     | <i>NDUFAP6</i> (HGNC:28625) | <i>MRE11</i> (HGNC:7230)    |
| <i>GDI1</i> (HGNC:4226)     | <i>NDUFS3</i> (HGNC:7710)   | <i>MVK</i> (HGNC:7530)      |
| <i>GK</i> (HGNC:4289)       | <i>NDUFS4</i> (HGNC:7711)   | <i>MYD88</i> (HGNC:7562)    |
| <i>GLDC</i> (HGNC:4313)     | <i>NDUFS7</i> (HGNC:7714)   | <i>MYO5B</i> (HGNC:7603)    |
| <i>GLI2</i> (HGNC:4318)     | <i>NDUFS8</i> (HGNC:7715)   | <i>NBN</i> (HGNC:7652)      |
| <i>GLI3</i> (HGNC:4319)     | <i>NEBL</i> (HGNC:16932)    | <i>NCF1</i> (HGNC:7660)     |
| <i>GNAO1</i> (HGNC:4389)    | <i>NEXN</i> (HGNC:29557)    | <i>NCF2</i> (HGNC:7661)     |
| <i>GNB1</i> (HGNC:4396)     | <i>NF1</i> (HGNC:7765)      | <i>NCF4</i> (HGNC:7662)     |

GNS (HGNC:4422) NKX2-5 (HGNC:2488) NFAT5 (HGNC:7774)  
 GOSR2 (HGNC:4431) NKX2-6 (HGNC:32940) NFKB1 (HGNC:7794)  
 GPC3 (HGNC:4451) NODAL (HGNC:7865) NFKB2 (HGNC:7795)  
 GPHN (HGNC:15465) NOTCH1 (HGNC:7881) NFKBIA (HGNC:7797)  
 GRIA3 (HGNC:4573) NPPA (HGNC:7939) NHEJ1 (HGNC:25737)  
 GRIK2 (HGNC:4580) NR2F2 (HGNC:7976) NHP2 (HGNC:14377)  
 GRIN1 (HGNC:4584) NRAS (HGNC:7989) NLRC4 (HGNC:16412)  
 GRIN2A (HGNC:4585) NSD1 (HGNC:14234) NLRP12 (HGNC:22938)  
 GRIN2B (HGNC:4586) OBSCN (HGNC:15719) NLRP3 (HGNC:16400)  
 GRIP1 (HGNC:18708) PCCA (HGNC:8653) NOD2 (HGNC:5331)  
 HCCS (HGNC:4837) PCCB (HGNC:8654) NOP10 (HGNC:14378)  
 HCN1 (HGNC:4845) PCSK9 (HGNC:20001) NRAS (HGNC:7989)  
 HCN4 (HGNC:16882) PDLIM3 (HGNC:20767) ORA1 (HGNC:25896)  
 HDAC8 (HGNC:13315) PET100 (HGNC:40038) PGM3 (HGNC:8907)  
 HGSNAT (HGNC:26527) PGM1 (HGNC:8905) PIK3CD (HGNC:8977)  
 HIP1 (HGNC:4913) PHYH (HGNC:8940) PIK3R1 (HGNC:8979)  
 HNRNPU (HGNC:5048) PKP2 (HGNC:9024) PLCG2 (HGNC:9066)  
 HPRT1 (HGNC:5157) PLEKHM2 (HGNC:29131) PMS2 (HGNC:9122)  
 HRAS (HGNC:5173) PLN (HGNC:9080) PNP (HGNC:7892)  
 HSD17B10 (HGNC:4800) PLOD1 (HGNC:9081) POLE (HGNC:9177)  
 HTRA1 (HGNC:9476) PMM2 (HGNC:9115) PRF1 (HGNC:9360)  
 HUWE1 (HGNC:30892) PPP1CB (HGNC:9282) PRKCD (HGNC:9399)  
 IDS (HGNC:5389) PRDM16 (HGNC:14000) PRKDC (HGNC:9413)  
 IL1RAPL1 (HGNC:5996) PRKAG2 (HGNC:9386) PTEN (HGNC:9588)  
 IQSEC2 (HGNC:29059) PRKG1 (HGNC:9414) PTPRC (HGNC:9666)  
 ITPA (HGNC:6176) PTPN11 (HGNC:9644) RAB27A (HGNC:9766)  
 KANSL1 (HGNC:24565) RAF1 (HGNC:9829) RAC2 (HGNC:9802)  
 KAT6A (HGNC:13013) RANGRF (HGNC:17679) RAG1 (HGNC:9831)  
 KAT6B (HGNC:17582) RASA1 (HGNC:9871) RAG2 (HGNC:9832)  
 KCNA1 (HGNC:6218) RASA2 (HGNC:9872) RBCK1 (HGNC:15864)  
 KCNA2 (HGNC:6220) RBM20 (HGNC:27424) RET (HGNC:9967)  
 KCNB1 (HGNC:6231) RIT1 (HGNC:10023) RFX5 (HGNC:9986)  
 KCNJ1 (HGNC:6255) RYR2 (HGNC:10484) RFXANK (HGNC:9987)  
 KCNJ10 (HGNC:6256) SCN10A (HGNC:10582) RFXAP (HGNC:9988)  
 KCNJ11 (HGNC:6257) SCN1B (HGNC:10586) RHOH (HGNC:686)  
 KCNMA1 (HGNC:6284) SCN2B (HGNC:10589) RMRP (HGNC:10031)  
 KCNQ2 (HGNC:6296) SCN3B (HGNC:20665) RNASEH2A (HGNC:18518)  
 KCNQ3 (HGNC:6297) SCN4B (HGNC:10592) RNASEH2B (HGNC:25671)  
 KCNT1 (HGNC:18865) SCN5A (HGNC:10593) RNASEH2C (HGNC:24116)  
 KCTD13 (HGNC:22234) SCO1 (HGNC:10603) RORC (HGNC:10260)  
 KCTD7 (HGNC:21957) SDHA (HGNC:10680) RTEL1 (HGNC:15888)  
 KDM5C (HGNC:11114) SDHAF1 (HGNC:33867) SAMHD1 (HGNC:15925)  
 KDM6A (HGNC:12637) SGCD (HGNC:10807) SBDS (HGNC:19440)  
 KIF11 (HGNC:6388) SGSH (HGNC:10818) SERPING1 (HGNC:1228)  
 KIF1A (HGNC:888) SHOC2 (HGNC:15454) SH2D1A (HGNC:1082)  
 KIF1BP (HGNC:23419) SKI (HGNC:10896) SKIV2L (HGNC:10898)  
 KIF2A (HGNC:6318) SLC22A5 (HGNC:10969) SLC35C1 (HGNC:20197)  
 KIRREL3 (HGNC:23204) SLC25A20 (HGNC:1421) SLC37A4 (HGNC:4061)  
 KMT2A (HGNC:7132) SLC2A10 (HGNC:13444) SLC9A3 (HGNC:11073)  
 KMT2D (HGNC:7133) SLC39A13 (HGNC:20859) SMARCAL1 (HGNC:11102)  
 KNL1 (HGNC:24054) SLMAP (HGNC:16643) SP110 (HGNC:5401)  
 KRAS (HGNC:6407) SMAD3 (HGNC:6769) SPINK5 (HGNC:15464)  
 KRIT1 (HGNC:15730) SMAD4 (HGNC:6770) STAT1 (HGNC:11362)  
 L1CAM (HGNC:6470) SMAD6 (HGNC:6772) STAT3 (HGNC:11364)  
 L2HGDH (HGNC:20499) SMAD9 (HGNC:6774) STAT5B (HGNC:11367)  
 LAMC3 (HGNC:6494) SNTA1 (HGNC:11167) STIM1 (HGNC:11386)  
 LAMP2 (HGNC:6501) SOS1 (HGNC:11187) STK4 (HGNC:11408)  
 LARGE1 (HGNC:6511) SOS2 (HGNC:11188) STX11 (HGNC:11429)  
 LAS1L (HGNC:25726) SPRED1 (HGNC:20249) STXBP2 (HGNC:11445)  
 LBR (HGNC:6518) SURF1 (HGNC:11474) TAP1 (HGNC:43)  
 LGI1 (HGNC:6572) TAZ (HGNC:11577) TAP2 (HGNC:44)  
 LIAS (HGNC:16429) TBX1 (HGNC:11592) TAPBP (HGNC:11566)  
 LINS1 (HGNC:30922) TBX5 (HGNC:11604) TAZ (HGNC:11577)  
 LRP2 (HGNC:6694) TCAP (HGNC:11610) TBX1 (HGNC:11592)  
 LZTR1 (HGNC:6742) TGFB2 (HGNC:11768) TCN2 (HGNC:11653)  
 MAGEL2 (HGNC:6814) TGFB3 (HGNC:11769) TERC (HGNC:11727)  
 MAGI2 (HGNC:18957) TGFB1 (HGNC:11772) TERT (HGNC:11730)  
 MAN1B1 (HGNC:6823) TGFB2 (HGNC:11773) TINF2 (HGNC:11824)  
 MAOA (HGNC:6833) TMEM43 (HGNC:28472) TLR3 (HGNC:11849)  
 MAP2K1 (HGNC:6840) TMEM70 (HGNC:26050) TMEM173 (HGNC:27962)  
 MAP2K2 (HGNC:6842) TMPO (HGNC:11875) TNFAIP3 (HGNC:11896)  
 MAPK10 (HGNC:6872) TNNC1 (HGNC:11943) TNFRSF13B (HGNC:18153)  
 MBD5 (HGNC:20444) TNNI3 (HGNC:11947) TNFRSF13C (HGNC:17755)  
 MBTPS2 (HGNC:15455) TNNT2 (HGNC:11949) TNFRSF1A (HGNC:11916)  
 MCPH1 (HGNC:6954) TPM1 (HGNC:12010) TNFSF12 (HGNC:11927)  
 MECP2 (HGNC:6990) TRDN (HGNC:12261) TREX1 (HGNC:12269)  
 MED12 (HGNC:11957) TRPM4 (HGNC:17993) TRIM22 (HGNC:16379)  
 MED13L (HGNC:22962) TTN (HGNC:12403) TRNT1 (HGNC:17341)  
 MED17 (HGNC:2375) TTR (HGNC:12405) TTC37 (HGNC:23639)  
 MED23 (HGNC:2372) TXNRD2 (HGNC:18155) TTC7A (HGNC:19750)  
 MEF2C (HGNC:6996) VCL (HGNC:12665) TYK2 (HGNC:12440)

MFSD8 (HGNC:28486) ZFPM2 (HGNC:16700) UNC13D (HGNC:23147)  
MID1 (HGNC:7095) ZIC3 (HGNC:12874) UNG (HGNC:12572)  
MRE11 (HGNC:7230) USB1 (HGNC:25792)  
MTHFR (HGNC:7436) VPS13B (HGNC:2183)  
MTOR (HGNC:3942) VPS45 (HGNC:14579)  
MYT1L (HGNC:7623) WAS (HGNC:12731)  
NAA10 (HGNC:18704) WIPF1 (HGNC:12736)  
NAGLU (HGNC:7632) WRAP53 (HGNC:25522)  
NBN (HGNC:7652) XIAP (HGNC:592)  
NDE1 (HGNC:17619) ZAP70 (HGNC:12858)  
NDP (HGNC:7678) ZBTB24 (ZNF450)  
NDUFA1 (HGNC:7683)  
NECAP1 (HGNC:24539)  
NEXMIF (HGNC:29433)  
NF1 (HGNC:7765)  
NFIX (HGNC:7788)  
NHEJ1 (HGNC:25737)  
NHLRC1 (HGNC:21576)  
NHS (HGNC:7820)  
NIN (HGNC:14906)  
NIPBL (HGNC:28862)  
NLGN4X (HGNC:14287)  
NODAL (HGNC:7865)  
NOTCH3 (HGNC:7883)  
NPRL2 (HGNC:24969)  
NPRL3 (HGNC:14124)  
NRAS (HGNC:7989)  
NRXN1 (HGNC:8008)  
NRXN3 (HGNC:8010)  
NSD1 (HGNC:14234)  
NSDHL (HGNC:13398)  
NSUN2 (HGNC:25994)  
OCRL (HGNC:8108)  
OFD1 (HGNC:2567)  
OPHN1 (HGNC:8148)  
OTC (HGNC:8512)  
PACS1 (HGNC:30032)  
PAFAH1B1 (HGNC:8574)  
PAK3 (HGNC:8592)  
PANK2 (HGNC:15894)  
PAX6 (HGNC:8620)  
PCDH19 (HGNC:14270)  
PCNT (HGNC:16068)  
PDCD10 (HGNC:8761)  
PDHA1 (HGNC:8806)  
PGK1 (HGNC:8896)  
PHF6 (HGNC:18145)  
PHF8 (HGNC:20672)  
PHGDH (HGNC:8923)  
PIGA (HGNC:8957)  
PIGN (HGNC:8967)  
PIGO (HGNC:23215)  
PIGV (HGNC:26031)  
PLA2G6 (HGNC:9039)  
PLCB1 (HGNC:15917)  
PLP1 (HGNC:9086)  
PNKP (HGNC:9154)  
PNPO (HGNC:30260)  
POGZ (HGNC:18801)  
POLG (HGNC:9179)  
POMGNT1 (HGNC:19139)  
POMT1 (HGNC:9202)  
POMT2 (HGNC:19743)  
PORCN (HGNC:17652)  
PPP1CB (HGNC:9282)  
PPT1 (HGNC:9325)  
PQBP1 (HGNC:9330)  
PRICKLE1 (HGNC:17019)  
PRICKLE2 (HGNC:20340)  
PRPS1 (HGNC:9462)  
PRRT2 (HGNC:30500)  
PTCH1 (HGNC:9585)  
PTCHD1 (HGNC:26392)  
PTEN (HGNC:9588)  
PTPN11 (HGNC:9644)  
PURA (HGNC:9701)  
RAB18 (HGNC:14244)  
RAB39B (HGNC:16499)  
RAB3GAP1 (HGNC:17063)  
RAB3GAP2 (HGNC:17168)  
RAD21 (HGNC:9811)

Journal Pre-proof

RAF1 (HGNC:9829)  
RAI1 (HGNC:9834)  
RARS2 (HGNC:21406)  
RASA2 (HGNC:9872)  
RBBP8 (HGNC:9891)  
RBM10 (HGNC:9896)  
RELN (HGNC:9957)  
RIT1 (HGNC:10023)  
RNASEH2A (HGNC:18518)  
RNASEH2B (HGNC:25671)  
RNASEH2C (HGNC:24116)  
RNU4ATAC (HGNC:34016)  
ROGDI (HGNC:29478)  
RPL10 (HGNC:10298)  
RPS6KA3 (HGNC:10432)  
SAMHD1 (HGNC:15925)  
SATB2 (HGNC:21637)  
SCARB2 (HGNC:1665)  
SCN1A (HGNC:10585)  
SCN1B (HGNC:10586)  
SCN2A (HGNC:10588)  
SCN3A (HGNC:10590)  
SCN5A (HGNC:10593)  
SCN8A (HGNC:10596)  
SCN9A (HGNC:10597)  
SERPINI1 (HGNC:8943)  
SETBP1 (HGNC:15573)  
SETD2 (HGNC:18420)  
SETD5 (HGNC:25566)  
SGSH (HGNC:10818)  
SHANK2\* (HGNC:14295)  
SHANK3\* (HGNC:14294)  
SHH (HGNC:10848)  
SHOC2 (HGNC:15454)  
SIK1 (HGNC:11142)  
SIX3 (HGNC:10889)  
SLC12A5 (HGNC:13818)  
SLC13A5 (HGNC:23089)  
SLC16A2 (HGNC:10923)  
SLC19A3 (HGNC:16266)  
SLC1A2 (HGNC:10940)  
SLC25A1 (HGNC:10979)  
SLC25A19 (HGNC:14409)  
SLC25A22 (HGNC:19954)  
SLC2A1 (HGNC:11005)  
SLC35A2 (HGNC:11022)  
SLC4A10 (HGNC:13811)  
SLC6A1 (HGNC:11042)  
SLC6A4 (HGNC:11050)  
SLC6A8 (HGNC:11055)  
SLC9A6 (HGNC:11079)  
SMARCA2 (HGNC:11098)  
SMARCA4 (HGNC:11100)  
SMARCB1 (HGNC:11103)  
SMARCE1 (HGNC:11109)  
SMC1A (HGNC:11111)  
SMC3 (HGNC:2468)  
SMS (HGNC:11123)  
SNAP25 (HGNC:11132)  
SNAP29 (HGNC:11133)  
SOS1 (HGNC:11187)  
SOS2 (HGNC:11188)  
SOX11 (HGNC:11191)  
SOX5 (HGNC:11201)  
SPRED1 (HGNC:20249)  
SPTAN1 (HGNC:11273)  
ST3GAL3 (HGNC:10866)  
ST3GAL5 (HGNC:10872)  
STAMBIP (HGNC:16950)  
STIL (HGNC:10879)  
STX1B (HGNC:18539)  
STXBP1 (HGNC:11444)  
SYN1 (HGNC:11494)  
SYNGAP1 (HGNC:11497)  
SYP (HGNC:11506)  
SZT2 (HGNC:29040)  
TAF1 (HGNC:11535)  
TBC1D24 (HGNC:29203)  
TBL1XR1 (HGNC:29529)  
TBR1 (HGNC:11590)  
TBX1 (HGNC:11592)

Journal Pre-proof

TCF12 (HGNC:11623)  
TCF20 (HGNC:11631)  
TCF4 (HGNC:11634)  
TDGF1 (HGNC:11701)  
TGIF1 (HGNC:11776)  
THOC2 (HGNC:19073)  
TIMM8A (HGNC:11817)  
TMEM231 (HGNC:37234)  
TMLHE (HGNC:18308)  
TPP1 (HGNC:2073)  
TRAPPC9 (HGNC:30832)  
TREX1 (HGNC:12269)  
TRIO (HGNC:12303)  
TRPM6 (HGNC:17995)  
TSC1 (HGNC:12362)  
TSC2 (HGNC:12363)  
TSPAN7 (HGNC:11854)  
TUBA1A (HGNC:20766)  
TUBA8 (HGNC:12410)  
TUBB (HGNC:20778)  
TUBB2A (HGNC:12412)  
TUBB2B (HGNC:30829)  
TUBB3 (HGNC:20772)  
TUBG1 (HGNC:12417)  
TUSC3 (HGNC:30242)  
UBE2A (HGNC:12472)  
UBE3A (HGNC:12496)  
UNC80 (HGNC:26582)  
UPF3B (HGNC:20439)  
USP9X (HGNC:12632)  
VANGL1 (HGNC:15512)  
VLDLR (HGNC:12698)  
VPS13A (HGNC:1908)  
VPS13B (HGNC:2183)  
WAC (HGNC:17327)  
WDR45 (HGNC:28912)  
WDR62 (HGNC:24502)  
WDR81 (HGNC:26600)  
WWOX (HGNC:12799)  
YWHAE (HGNC:12851)  
ZC4H2 (HGNC:24931)  
ZDHHC9 (HGNC:18475)  
ZEB2 (HGNC:14881)  
ZIC2 (HGNC:12873)  
ZMYND11 (HGNC:16966)  
ZNF407 (HGNC:19904)  
ZNF711 (HGNC:13128)

Journal Pre-proof



**eTable 8. Genes included on commercial gene panel tests used for *in silico* analysis of diagnostic yield**

| Neurologic                    |                                    | Cardiac                         |                              |                               |                            | Immunologic                                        |
|-------------------------------|------------------------------------|---------------------------------|------------------------------|-------------------------------|----------------------------|----------------------------------------------------|
| Ambry NDD Next<br>(202 genes) | Ambry Epilepsy Next<br>(124 genes) | Ambry Rhythm Next<br>(42 genes) | Ambry HCM Next<br>(30 genes) | Ambry TAAD Next<br>(35 genes) | Invitae CHD<br>(55 genes)  | Invitae Primary<br>Immunodeficiency<br>(429 genes) |
| <i>ABCD1</i> (HGNC:61)        | <i>ALDH7A1</i> (HGNC:877)          | <i>AKAP9</i> (HGNC:379)         | <i>ACTC1</i> (HGNC:143)      | <i>ACTA2</i> (HGNC:130)       | <i>ACTC1</i> (HGNC:143)    | <i>ACD</i> (HGNC:25070)                            |
| <i>ACTB</i> (HGNC:132)        | <i>AMT</i> (HGNC:473)              | <i>ANK2</i> (HGNC:493)          | <i>ACTN2</i> (HGNC:164)      | <i>BGN</i> (HGNC:1044)        | <i>ACVR2B</i> (HGNC:174)   | <i>ACP5</i> (HGNC:124)                             |
| <i>ACTG1</i> (HGNC:144)       | <i>ANKRD11</i> (HGNC:213)          | <i>CACNA1C</i> (HGNC:1390)      | <i>ALPK3</i> (HGNC:17574)    | <i>CBS</i> (HGNC:1550)        | <i>ALMS1</i> (HGNC:428)    | <i>ACTB</i> (HGNC:132)                             |
| <i>ADNP</i> (HGNC:15766)      | <i>ARHGEF9</i> (HGNC:145)          | <i>CACNA2D1</i> (HGNC:1399)     | <i>ANKRD1</i> (HGNC:15819)   | <i>CHST14</i> (HGNC:24464)    | <i>BCOR</i> (HGNC:20893)   | <i>ADA</i> (HGNC:186)                              |
| <i>AHCY</i> (HGNC:343)        | <i>ARX</i> (HGNC:18060)            | <i>CACNB2</i> (HGNC:1402)       | <i>CSRP3</i> (HGNC:2472)     | <i>COL1A1</i> (HGNC:2197)     | <i>BRAF</i> (HGNC:1097)    | <i>ADA2</i> (HGNC:1839)                            |
| <i>AHDC1</i> (HGNC:25230)     | <i>ASNS</i> (HGNC:753)             | <i>CALM1</i> (HGNC:1442)        | <i>FHL1</i> (HGNC:3702)      | <i>COL1A2</i> (HGNC:2198)     | <i>CASZ1</i> (HGNC:26002)  | <i>ADAM17</i> (HGNC:195)                           |
| <i>ANK2</i> (HGNC:493)        | <i>ATP13A2</i> (HGNC:3021)         | <i>CALM2</i> (HGNC:1445)        | <i>FLNC</i> (HGNC:3756)      | <i>COL3A1</i> (HGNC:2201)     | <i>CBL</i> (HGNC:1541)     | <i>ADAR</i> (HGNC:225)                             |
| <i>ANKRD11</i> (HGNC:21316)   | <i>ATP1A2</i> (HGNC:800)           | <i>CALM3</i> (HGNC:1449)        | <i>GLA</i> (HGNC:4296)       | <i>COL5A1</i> (HGNC:2209)     | <i>CHD7</i> (HGNC:20626)   | <i>ADGRE2</i> (HGNC:3337)                          |
| <i>ARHGEF9</i> (HGNC:14561)   | <i>ATP1A3</i> (HGNC:801)           | <i>CASQ2</i> (HGNC:1513)        | <i>JPH2</i> (HGNC:14202)     | <i>COL5A2</i> (HGNC:2210)     | <i>CRELD1</i> (HGNC:14630) | <i>AICDA</i> (HGNC:13203)                          |
| <i>ARID1A</i> (HGNC:11110)    | <i>BRAT1</i> (HGNC:21701)          | <i>CAV3</i> (HGNC:1529)         | <i>LAMP2</i> (HGNC:6501)     | <i>EFEMP2</i> (HGNC:3219)     | <i>ELN</i> (HGNC:3327)     | <i>AIRE</i> (HGNC:360)                             |
| <i>ARID1B</i> (HGNC:18040)    | <i>CACNA1A</i> (HGNC:138)          | <i>DES</i> (HGNC:2770)          | <i>MYBPC3</i> (HGNC:7551)    | <i>FBN1</i> (HGNC:3603)       | <i>FOXH1</i> (HGNC:3814)   | <i>AK2</i> (HGNC:362)                              |
| <i>ARID2</i> (HGNC:18037)     | <i>CACNA1E</i> (HGNC:139)          | <i>DSC2</i> (HGNC:3036)         | <i>MYH6</i> (HGNC:7576)      | <i>FBN2</i> (HGNC:3604)       | <i>GATA4</i> (HGNC:4173)   | <i>ALG6</i> (HGNC:23157)                           |
| <i>ARX</i> (HGNC:18060)       | <i>CASK</i> (HGNC:1497)            | <i>DSG2</i> (HGNC:3049)         | <i>MYH7</i> (HGNC:7577)      | <i>FKBP14</i> (HGNC:18625)    | <i>GATA5</i> (HGNC:15802)  | <i>ALPK1</i> (HGNC:20917)                          |
| <i>ASPM</i> (HGNC:19048)      | <i>CDKL5</i> (HGNC:11411)          | <i>DSP</i> (HGNC:3052)          | <i>MYL2</i> (HGNC:7583)      | <i>FLNA</i> (HGNC:3754)       | <i>GATA6</i> (HGNC:4174)   | <i>ANGPT1</i> (HGNC:484)                           |
| <i>ASXL1</i> (HGNC:18318)     | <i>CHD2</i> (HGNC:1917)            | <i>GPD1L</i> (HGNC:28956)       | <i>MYL3</i> (HGNC:7584)      | <i>FOXE3</i> (HGNC:3808)      | <i>GDF1</i> (HGNC:4214)    | <i>ANKZF1</i> (HGNC:25527)                         |
| <i>ASXL3</i> (HGNC:29357)     | <i>CHRNA2</i> (HGNC:1956)          | <i>HCN4</i> (HGNC:16882)        | <i>MYPN</i> (HGNC:23246)     | <i>LOX</i> (HGNC:6664)        | <i>GJA1</i> (HGNC:4274)    | <i>AP3B1</i> (HGNC:566)                            |
| <i>ATP13A2</i> (HGNC:30213)   | <i>CHRNA4</i> (HGNC:1958)          | <i>JUP</i> (HGNC:6207)          | <i>NEXN</i> (HGNC:29557)     | <i>MAT2A</i> (HGNC:6904)      | <i>GPC3</i> (HGNC:4451)    | <i>AP3D1</i> (HGNC:568)                            |
| <i>ATP1A3</i> (HGNC:801)      | <i>CHRN2</i> (HGNC:1962)           | <i>KCND3</i> (HGNC:6239)        | <i>PLN</i> (HGNC:9080)       | <i>MED12</i> (HGNC:11957)     | <i>HAND1</i> (HGNC:4807)   | <i>ARHGEF1</i> (HGNC:681)                          |
| <i>ATP7A</i> (HGNC:869)       | <i>CLN3</i> (HGNC:2074)            | <i>KCNE1</i> (HGNC:6240)        | <i>PRKAG2</i> (HGNC:9386)    | <i>MFAP5</i> (HGNC:29673)     | <i>HAND2</i> (HGNC:4808)   | <i>ARPC1B</i> (HGNC:704)                           |
| <i>ATRX</i> (HGNC:886)        | <i>CLN5</i> (HGNC:2076)            | <i>KCNE2</i> (HGNC:6242)        | <i>PTPN11</i> (HGNC:9644)    | <i>MYH11</i> (HGNC:7569)      | <i>HRAS</i> (HGNC:5173)    | <i>ASAH1</i> (HGNC:735)                            |
| <i>AUTS2</i> (HGNC:14262)     | <i>CLN6</i> (HGNC:2077)            | <i>KCNE3</i> (HGNC:6243)        | <i>RAF1</i> (HGNC:9829)      | <i>MYLK</i> (HGNC:7590)       | <i>JAG1</i> (HGNC:6188)    | <i>ATM</i> (HGNC:795)                              |
| <i>BCL11A</i> (HGNC:13221)    | <i>CLN8</i> (HGNC:2079)            | <i>KCNH2</i> (HGNC:6251)        | <i>RIT1</i> (HGNC:10023)     | <i>NOTCH1</i> (HGNC:7881)     | <i>KDM6A</i> (HGNC:12637)  | <i>ATP6AP1</i> (HGNC:868)                          |
| <i>BCL11B</i> (HGNC:13222)    | <i>CNTNAP2</i> (HGNC:138)          | <i>KCNJ2</i> (HGNC:6263)        | <i>SOS1</i> (HGNC:11187)     | <i>PLOD1</i> (HGNC:9081)      | <i>KMT2D</i> (HGNC:7133)   | <i>B2M</i> (HGNC:914)                              |
| <i>BRAF</i> (HGNC:1097)       | <i>COL4A1</i> (HGNC:2202)          | <i>KCNJ5</i> (HGNC:6266)        | <i>TCAP</i> (HGNC:11610)     | <i>PRDM5</i> (HGNC:9349)      | <i>KRAS</i> (HGNC:6407)    | <i>BACH2</i> (HGNC:14078)                          |
| <i>BRAT1</i> (HGNC:21701)     | <i>CSTB</i> (HGNC:2482)            | <i>KCNJ8</i> (HGNC:6269)        | <i>TNNC1</i> (HGNC:11943)    | <i>PRKG1</i> (HGNC:9414)      | <i>LEFTY2</i> (HGNC:3122)  | <i>BCL10</i> (HGNC:989)                            |
| <i>BRPF1</i> (HGNC:14255)     | <i>CTSD</i> (HGNC:2529)            | <i>KCNQ1</i> (HGNC:6294)        | <i>TNN3</i> (HGNC:11947)     | <i>SKI</i> (HGNC:10896)       | <i>MAP2K1</i> (HGNC:6840)  | <i>BCL11B</i> (HGNC:13222)                         |
| <i>CACNA1A</i> (HGNC:1388)    | <i>CTSF</i> (HGNC:2531)            | <i>LMNA</i> (HGNC:6636)         | <i>TNNT2</i> (HGNC:11949)    | <i>SLC2A10</i> (HGNC:13444)   | <i>MAP2K2</i> (HGNC:6842)  | <i>BLM</i> (HGNC:1058)                             |
| <i>CAMK2B</i> (HGNC:1461)     | <i>DCX</i> (HGNC:2714)             | <i>NKX2-5</i> (HGNC:2488)       | <i>TPM1</i> (HGNC:12010)     | <i>SMAD3</i> (HGNC:6769)      | <i>MED13L</i> (HGNC:22962) | <i>BLNK</i> (HGNC:14211)                           |
| <i>CASK</i> (HGNC:1497)       | <i>DDC</i> (HGNC:2719)             | <i>PKP2</i> (HGNC:9024)         | <i>TTR</i> (HGNC:12405)      | <i>SMAD4</i> (HGNC:6770)      | <i>MEIS2</i> (HGNC:7001)   | <i>BLOC1S3</i> (HGNC:20914)                        |
| <i>CBL</i> (HGNC:1541)        | <i>DEPDC5</i> (HGNC:1842)          | <i>PLN</i> (HGNC:9080)          | <i>VCL</i> (HGNC:12665)      | <i>TGFB2</i> (HGNC:11768)     | <i>MESP1</i> (HGNC:29658)  | <i>BLOC1S6</i> (HGNC:8549)                         |
| <i>CC2D1A</i> (HGNC:30237)    | <i>DNAJC5</i> (HGNC:1623)          | <i>RYR2</i> (HGNC:10484)        |                              | <i>TGFB3</i> (HGNC:11769)     | <i>MYH6</i> (HGNC:7576)    | <i>BTK</i> (HGNC:1133)                             |
| <i>CC2D2A</i> (HGNC:29253)    | <i>DNM1</i> (HGNC:2972)            | <i>SCN10A</i> (HGNC:10582)      |                              | <i>TGFBR1</i> (HGNC:11772)    | <i>NFATC1</i> (HGNC:7775)  | <i>C17orf62</i> (HGNC:28672)                       |
| <i>CDK13</i> (HGNC:1733)      | <i>DYNC1H1</i> (HGNC:296)          | <i>SCN1B</i> (HGNC:10586)       |                              | <i>TGFBR2</i> (HGNC:11773)    | <i>NKX2-5</i> (HGNC:2488)  | <i>C1QA</i> (HGNC:1241)                            |
| <i>CDKL5</i> (HGNC:11411)     | <i>DYRK1A</i> (HGNC:3091)          | <i>SCN3B</i> (HGNC:20665)       |                              | <i>TNXB</i> (HGNC:11976)      | <i>NKX2-6</i> (HGNC:32940) | <i>C1QB</i> (HGNC:1242)                            |
| <i>CEP290</i> (HGNC:29021)    | <i>EEF1A2</i> (HGNC:3192)          | <i>SCN4B</i> (HGNC:10592)       |                              | <i>ZNF469</i> (HGNC:23216)    | <i>NODAL</i> (HGNC:7865)   | <i>C1QC</i> (HGNC:1245)                            |
| <i>CHD2</i> (HGNC:1917)       | <i>EHMT1</i> (HGNC:24650)          | <i>SCN5A</i> (HGNC:10593)       |                              |                               | <i>NOTCH1</i> (HGNC:7881)  | <i>C1S</i> (HGNC:1247)                             |
| <i>CHD3</i> (HGNC:1918)       | <i>EPM2A</i> (HGNC:3413)           | <i>SNTA1</i> (HGNC:11167)       |                              |                               | <i>NR2F2</i> (HGNC:7976)   | <i>C2</i> (HGNC:1248)                              |
| <i>CHD7</i> (HGNC:20626)      | <i>FLNA</i> (HGNC:3754)            | <i>TBX5</i> (HGNC:11604)        |                              |                               | <i>NRAS</i> (HGNC:7989)    | <i>C3</i> (HGNC:1318)                              |
| <i>CHD8</i> (HGNC:20153)      | <i>FOLR1</i> (HGNC:3791)           | <i>TECRL</i> (HGNC:27365)       |                              |                               | <i>NSD1</i> (HGNC:14234)   | <i>C5</i> (HGNC:1331)                              |
| <i>CIC</i> (HGNC:14214)       | <i>FOXP1</i> (HGNC:3811)           | <i>TMEM43</i> (HGNC:28472)      |                              |                               | <i>PLD1</i> (HGNC:9067)    | <i>C6</i> (HGNC:1339)                              |
| <i>CLCN4</i> (HGNC:2022)      | <i>FOXP1</i> (HGNC:3823)           | <i>TRDN</i> (HGNC:12261)        |                              |                               | <i>PTPN11</i> (HGNC:9644)  | <i>C7</i> (HGNC:1346)                              |
| <i>CNTNAP2</i> (HGNC:13830)   | <i>GABRA1</i> (HGNC:4075)          | <i>TRPM4</i> (HGNC:17993)       |                              |                               | <i>RAF1</i> (HGNC:9829)    | <i>C8A</i> (HGNC:1352)                             |
| <i>COL4A1</i> (HGNC:2202)     | <i>GABRB3</i> (HGNC:4083)          |                                 |                              |                               | <i>RBFOX2</i> (HGNC:9906)  | <i>C8B</i> (HGNC:1353)                             |
| <i>CREBBP</i> (HGNC:2348)     | <i>GABRG2</i> (HGNC:4087)          |                                 |                              |                               | <i>RIT1</i> (HGNC:10023)   | <i>C9</i> (HGNC:1358)                              |
| <i>CSNK2A1</i> (HGNC:2457)    | <i>GAMT</i> (HGNC:4136)            |                                 |                              |                               | <i>ROBO1</i> (HGNC:10249)  | <i>CARD11</i> (HGNC:16393)                         |
| <i>CSNK2B</i> (HGNC:2460)     | <i>GATM</i> (HGNC:4175)            |                                 |                              |                               | <i>SHOC2</i> (HGNC:15454)  | <i>CARD14</i> (HGNC:16446)                         |
| <i>CTCF</i> (HGNC:13723)      | <i>GLDC</i> (HGNC:4313)            |                                 |                              |                               | <i>SMAD6</i> (HGNC:6772)   | <i>CARD8</i> (HGNC:17057)                          |
| <i>CTNNA1</i> (HGNC:2514)     | <i>GNAO1</i> (HGNC:4389)           |                                 |                              |                               | <i>SOS1</i> (HGNC:11187)   | <i>CARD9</i> (HGNC:16391)                          |
| <i>CUL4B</i> (HGNC:2555)      | <i>GOSR2</i> (HGNC:4431)           |                                 |                              |                               | <i>TAB2</i> (HGNC:17075)   | <i>CARMIL2</i> (HGNC:27089)                        |
| <i>DDC</i> (HGNC:2719)        | <i>GRIN1</i> (HGNC:4584)           |                                 |                              |                               | <i>TBX1</i> (HGNC:11592)   | <i>CASP10</i> (HGNC:1500)                          |
| <i>DDX3X</i> (HGNC:2745)      | <i>GRIN2A</i> (HGNC:4585)          |                                 |                              |                               | <i>TBX20</i> (HGNC:11598)  | <i>CASP8</i> (HGNC:1509)                           |
| <i>DEAF1</i> (HGNC:14677)     | <i>GRIN2B</i> (HGNC:4586)          |                                 |                              |                               | <i>TBX5</i> (HGNC:11604)   | <i>CBL</i> (HGNC:1541)                             |
| <i>DHCR7</i> (HGNC:2860)      | <i>GRN</i> (HGNC:4601)             |                                 |                              |                               | <i>TFAP2B</i> (HGNC:11743) | <i>CCBE1</i>                                       |
| <i>DHX30</i> (HGNC:16716)     | <i>H3F3A</i> (HGNC:4764)           |                                 |                              |                               | <i>ZFPM2</i> (HGNC:16700)  | <i>CD19</i> (HGNC:1633)                            |
| <i>DLG3</i> (HGNC:2902)       | <i>HCN1</i> (HGNC:4845)            |                                 |                              |                               | <i>ZIC3</i> (HGNC:12874)   | <i>CD247</i> (HGNC:1677)                           |
| <i>DNM1</i> (HGNC:2972)       | <i>HNRNPU</i> (HGNC:5048)          |                                 |                              |                               |                            | <i>CD27</i> (HGNC:11922)                           |
| <i>DNMT3A</i> (HGNC:2978)     | <i>IQSEC2</i> (HGNC:29059)         |                                 |                              |                               |                            | <i>CD3D</i> (HGNC:1673)                            |
| <i>DPF2</i> (HGNC:9964)       | <i>KCNA2</i> (HGNC:6220)           |                                 |                              |                               |                            | <i>CD3E</i> (HGNC:1674)                            |
| <i>DYNC1H1</i> (HGNC:2961)    | <i>KCNB1</i> (HGNC:6231)           |                                 |                              |                               |                            | <i>CD3G</i> (HGNC:1675)                            |
| <i>DYRK1A</i> (HGNC:3091)     | <i>KCNC1</i> (HGNC:6233)           |                                 |                              |                               |                            | <i>CD40</i> (HGNC:11919)                           |
| <i>EBF3</i> (HGNC:19087)      | <i>KCNH1</i> (HGNC:6250)           |                                 |                              |                               |                            | <i>CD40LG</i> (HGNC:11935)                         |
| <i>EEF1A2</i> (HGNC:3192)     | <i>KCNJ10</i> (HGNC:6256)          |                                 |                              |                               |                            | <i>CD46</i> (HGNC:6953)                            |
| <i>EFTUD2</i> (HGNC:30858)    | <i>KCNQ2</i> (HGNC:6296)           |                                 |                              |                               |                            | <i>CD55</i> (HGNC:2665)                            |
| <i>EHMT1</i> (HGNC:24650)     | <i>KCNQ3</i> (HGNC:6297)           |                                 |                              |                               |                            | <i>CD59</i> (HGNC:1689)                            |
| <i>EP300</i> (HGNC:3373)      | <i>KCNT1</i> (HGNC:18865)          |                                 |                              |                               |                            | <i>CD79A</i> (HGNC:1698)                           |
| <i>FBXL4</i> (HGNC:13601)     | <i>KCTD7</i> (HGNC:21957)          |                                 |                              |                               |                            | <i>CD79B</i> (HGNC:1699)                           |
| <i>FDXR</i> (HGNC:3642)       | <i>KIAA2022</i> (HGNC:29433)       |                                 |                              |                               |                            | <i>CD81</i> (HGNC:1701)                            |
| <i>FGD1</i> (HGNC:3663)       | <i>LGI1</i> (HGNC:6572)            |                                 |                              |                               |                            | <i>CD8A</i> (HGNC:1706)                            |
| <i>FLNA</i> (HGNC:3754)       | <i>MBD5</i> (HGNC:20444)           |                                 |                              |                               |                            | <i>CDC42</i> (HGNC:1736)                           |
| <i>FMR1</i> (HGNC:3775)       | <i>MECP2</i> (HGNC:6990)           |                                 |                              |                               |                            | <i>CDC47</i> (HGNC:14628)                          |
| <i>FOXP1</i> (HGNC:3811)      | <i>MEF2C</i> (HGNC:6996)           |                                 |                              |                               |                            | <i>CEBPE</i> (HGNC:1836)                           |
| <i>GABRG2</i> (HGNC:4087)     | <i>MFSD8</i> (HGNC:28486)          |                                 |                              |                               |                            | <i>CFB</i> (HGNC:1037)                             |
| <i>GAMT</i> (HGNC:4136)       | <i>MOCS1</i> (HGNC:7190)           |                                 |                              |                               |                            | <i>CFD</i> (HGNC:2771)                             |
| <i>GATAD2B</i> (HGNC:30778)   | <i>MOCS2</i> (HGNC:7193)           |                                 |                              |                               |                            | <i>CFH</i> (HGNC:4883)                             |
| <i>GNAO1</i> (HGNC:4389)      | <i>NGLY1</i> (HGNC:17646)          |                                 |                              |                               |                            | <i>CFI</i> (HGNC:5394)                             |



GNB1 (HGNC:4396)  
GRIA3 (HGNC:4573)  
GRIN1 (HGNC:4584)  
GRIN2A (HGNC:4585)  
GRIN2B (HGNC:4586)  
H3F3A (HGNC:4764)  
HDAC8 (HGNC:13315)  
HECW2 (HECW2)  
HIST1H1E (HGNC:4718)  
HIVEP2 (HGNC:4921)  
HNRNPH2 (HGNC:5042)  
HNRNPK (HGNC:5044)  
HNRNPU (HGNC:5048)  
HRAS (HGNC:5173)  
HUWE1 (HGNC:30892)  
IQSEC2 (HGNC:29059)  
ITPR1 (HGNC:6180)  
KANSL1 (HGNC:24565)  
KAT6A (HGNC:13013)  
KAT6B (HGNC:17582)  
KCNB1 (HGNC:6231)  
KCNQ2 (HGNC:6296)  
KCNQ5 (HGNC:6299)  
KDM5B (HGNC:18039)  
KDM5C (HGNC:11114)  
KDM6A (HGNC:12637)  
KIAA2022 (HGNC:29433)  
KIF1A (HGNC:888)  
KMT2A (HGNC:7132)  
KMT2B (HGNC:15840)  
KMT2D (HGNC:7133)  
KMT2E (HGNC:18541)  
KMT5B (HGNC:24283)  
KRAS (HGNC:6407)  
LZTR1 (HGNC:6742)  
MAGEL2 (HGNC:6814)  
MAP2K1 (HGNC:6840)  
MAP2K2 (HGNC:6842)  
MAPK8IP3 (HGNC:6884)  
MBD5 (HGNC:20444)  
MECP2 (HGNC:6990)  
MED12 (HGNC:11957)  
MED13L (HGNC:22962)  
METTL23 (HGNC:26988)  
MRAS (HGNC:7227)  
MTOR (HGNC:3942)  
NAA15 (HGNC:30782)  
NALCN (HGNC:19082)  
NF1 (HGNC:7765)  
NFIA (HGNC:7784)  
NIPBL (HGNC:28862)  
NPC1 (HGNC:7897)  
NR2F1 (HGNC:7975)  
NRAS (HGNC:7989)  
NSD1 (HGNC:14234)  
OTC (HGNC:8512)  
PACS1 (HGNC:30032)  
PDHA1 (HGNC:8806)  
PHF6 (HGNC:18145)  
PMM2 (HGNC:9115)  
POGZ (HGNC:18801)  
POLR2A (HGNC:9187)  
POU3F3 (HGNC:9216)  
PPM1D (HGNC:9277)  
PPP1CB (HGNC:9282)  
PPP2R5D (HGNC:9312)  
PQBP1 (HGNC:9330)  
PTEN (HGNC:9588)  
PTPN11 (HGNC:9644)  
PUF60 (HGNC:17042)  
PURA (HGNC:9701)  
RAD21 (HGNC:9811)  
RAF1 (HGNC:9829)  
RAI1 (HGNC:9834)  
RERE (HGNC:9965)  
RIT1 (HGNC:10023)  
RPS6KA3 (HGNC:10432)  
SATB2 (HGNC:21637)  
SCN1A (HGNC:10585)  
SCN2A (HGNC:10588)  
SCN3A (HGNC:10590)  
SCN8A (HGNC:10596)

NHLRC1 (HGNC:21576)  
PACS1 (HGNC:30032)  
PCDH19 (HGNC:14270)  
PHGDH (HGNC:8923)  
PIGA (HGNC:8957)  
PLCB1 (HGNC:15917)  
PNKP (HGNC:9154)  
PNPO (HGNC:30260)  
POLG (HGNC:9179)  
PPT1 (HGNC:9325)  
PRICKLE1 (HGNC:17019)  
PRRT2 (HGNC:30500)  
PURA (HGNC:9701)  
RHOBTB2 (HGNC:18756)  
SATB2 (HGNC:21637)  
SCARB2 (HGNC:1665)  
SCN1A (HGNC:10585)  
SCN1B (HGNC:10586)  
SCN2A (HGNC:10588)  
SCN3A (HGNC:10590)  
SCN8A (HGNC:10596)  
SIK1 (HGNC:11142)  
SLC13A5 (HGNC:23089)  
SLC19A3 (HGNC:16266)  
SLC25A22 (HGNC:19954)  
SLC2A1 (HGNC:11005)  
SLC35A2 (HGNC:11022)  
SLC6A1 (HGNC:11042)  
SLC6A8 (HGNC:11055)  
SLC9A6 (HGNC:11079)  
SMC1A (HGNC:11111)  
SNAP25 (HGNC:11132)  
SPTAN1 (HGNC:11273)  
ST3GAL5 (HGNC:10872)  
STX1B (HGNC:18539)  
STXBP1 (HGNC:11444)  
SYNGAP1 (HGNC:11497)  
SZT2 (HGNC:29040)  
TBC1D24 (HGNC:29203)  
TBL1XR1 (HGNC:29529)  
TCF4 (HGNC:11634)  
TPP1 (HGNC:2073)  
TRIO (HGNC:12303)  
TSC1 (HGNC:12362)  
TSC2 (HGNC:12363)  
TUBA1A (HGNC:20766)  
UBE3A (HGNC:12496)  
WDR45 (HGNC:28912)  
ZEB2 (HGNC:14881)

CFP (HGNC:8864)  
CHD7 (HGNC:20626)  
CIB1 (HGNC:16920)  
CIITA (HGNC:7067)  
CLCN7 (HGNC:2025)  
CLPB (HGNC:30664)  
COL7A1 (HGNC:2214)  
COPA (HGNC:2230)  
CORO1A (HGNC:2252)  
CR2 (HGNC:2336)  
CSF2RA (HGNC:2435)  
CSF2RB (HGNC:2436)  
CSF3R (HGNC:2439)  
CTC1 (HGNC:26169)  
CTLA4 (HGNC:2505)  
CTPS1 (HGNC:2519)  
CTSC (HGNC:2528)  
CXCR2 (HGNC:6027)  
CXCR4 (HGNC:2561)  
CYBA (HGNC:2577)  
CYBB (HGNC:2578)  
CYP27A1 (HGNC:2605)  
DBR1 (HGNC:15594)  
DCLRE1C (HGNC:17642)  
DDX58 (HGNC:19102)  
DEF6 (HGNC:2760)  
DGAT1 (HGNC:2843)  
DIAPH1 (HGNC:2876)  
DKC1 (HGNC:2890)  
DNAJC21 (HGNC:27030)  
DNASE1L3 (HGNC:2959)  
DNASE2 (HGNC:2960)  
DNMT3B (HGNC:2979)  
DOCK2 (HGNC:2988)  
DOCK8 (HGNC:19191)  
DSG1 (HGNC:3048)  
DTNBP1 (HGNC:17328)  
DUOX2 (HGNC:13273)  
EFL1 (HGNC:25789)  
EIF2AK3 (HGNC:3255)  
ELANE (HGNC:3309)  
EPG5 (HGNC:29331)  
ERBIN (HGNC:15842)  
ERCC2 (HGNC:3434)  
ERCC3 (HGNC:3435)  
ERCC6L2 (HGNC:26922)  
EXTL3 (HGNC:3518)  
FADD (HGNC:3573)  
FANCA (HGNC:3582)  
FANCB (HGNC:3583)  
FANCE (HGNC:3586)  
FANCF (HGNC:3587)  
FANCI (HGNC:25568)  
FANCL (HGNC:20748)  
FAS (HGNC:11920)  
FASLG (HGNC:11936)  
FAT4 (HGNC:23109)  
FCHO1 (HGNC:29002)  
FERMT1 (HGNC:15889)  
FERMT3 (HGNC:23151)  
FNIP1 (HGNC:29418)  
FOXI3 (HGNC:35123)  
FOXP1 (HGNC:12765)  
FOXP3 (HGNC:6106)  
FPR1 (HGNC:3826)  
G6PC (HGNC:4056)  
G6PC3 (HGNC:24861)  
G6PD (HGNC:4057)  
GATA1  
GATA2 (HGNC:4171)  
GFI1 (HGNC:4237)  
GINS1 (HGNC:28980)  
GTF2E2 (HGNC:4651)  
GTF2H5 (HGNC:21157)  
GUCY2C (HGNC:4688)  
HAX1 (HGNC:16915)  
HELLS (HGNC:4861)  
HMOX1 (HGNC:5013)  
HPS1 (HGNC:5163)  
HPS3 (HGNC:15597)  
HPS4 (HGNC:15844)  
HPS5 (HGNC:17022)

SETBP1 (HGNC:15573)  
SETD2 (HGNC:18420)  
SETD5 (HGNC:25566)  
SHANK3 (HGNC:14294)  
SHOC2 (HGNC:15454)  
SIN3A (HGNC:19353)  
SLC16A2 (HGNC:10923)  
SLC2A1 (HGNC:11005)  
SLC6A1 (HGNC:11042)  
SLC6A8 (HGNC:11055)  
SMARCA2 (HGNC:11098)  
SMARCA4 (HGNC:11100)  
SMC1A (HGNC:11111)  
SMC3 (HGNC:2468)  
SON (HGNC:11183)  
SOS1 (HGNC:11187)  
SOS2 (HGNC:11188)  
SOX5 (HGNC:11201)  
SPAST (HGNC:11233)  
STAG1 (HGNC:11354)  
STAG2 (HGNC:11355)  
STXBP1 (HGNC:11444)  
SURF1 (HGNC:11474)  
SYNGAP1 (HGNC:11497)  
TBL1XR1 (HGNC:29529)  
TCF20 (HGNC:11631)  
TCF4 (HGNC:11634)  
TRAPPC9 (HGNC:30832)  
TRIO (HGNC:12303)  
TRIP12 (HGNC:12306)  
TRRAP (HGNC:12347)  
TSC1 (HGNC:12362)  
TSC2 (HGNC:12363)  
TUBA1A (HGNC:20766)  
TUBB (HGNC:20778)  
UBE3A (HGNC:12496)  
USP9X (HGNC:12632)  
VPS13B (HGNC:2183)  
WAC (HGNC:17327)  
WDR45 (HGNC:28912)  
ZBTB18 (HGNC:13030)  
ZBTB20 (HGNC:13503)  
ZEB2 (HGNC:14881)  
ZMYND11 (HGNC:16966)  
ZNF292 (HGNC:18410)

HPS6 (HGNC:18817)  
HTRA2 (HGNC:14348)  
HYOU1 (HGNC:16931)  
ICOS (HGNC:5351)  
ICOSLG (HGNC:17087)  
IFIH1 (HGNC:18873)  
IFNAR1 (HGNC:5432)  
IFNAR2 (HGNC:5433)  
IFNGR1 (HGNC:5439)  
IFNGR2 (HGNC:5440)  
IGLL1 (HGNC:5870)  
IKKB (HGNC:5960)  
IKZF1 (HGNC:13176)  
IL10 (HGNC:5962)  
IL10RA (HGNC:5964)  
IL10RB (HGNC:5965)  
IL12B (HGNC:5970)  
IL12RB1 (HGNC:5971)  
IL12RB2 (HGNC:5972)  
IL17F (HGNC:16404)  
IL17RA (HGNC:5985)  
IL17RC (HGNC:18358)  
IL18BP (HGNC:5987)  
IL1RN (HGNC:6000)  
IL21 (HGNC:6005)  
IL21R (HGNC:6006)  
IL23R (HGNC:19100)  
IL2RA (HGNC:6008)  
IL2RB (HGNC:6009)  
IL2RG (HGNC:6010)  
IL36RN (HGNC:15561)  
IL6R (HGNC:6019)  
IL6ST (HGNC:6021)  
IL7R (HGNC:6024)  
IRAK4 (HGNC:17967)  
IRF2BP2 (HGNC:21729)  
IRF4 (HGNC:6119)  
IRF7 (HGNC:6122)  
IRF8 (HGNC:5358)  
IRF9 (HGNC:6131)  
ISG15 (HGNC:4053)  
ITCH (HGNC:13890)  
ITGAM (HGNC:6149)  
ITGB2 (HGNC:6155)  
ITK (HGNC:6171)  
JAGN1 (HGNC:26926)  
JAK1 (HGNC:6190)  
JAK3 (HGNC:6193)  
KAT6A (HGNC:13013)  
KDM6A (HGNC:12637)  
KMT2A (HGNC:7132)  
KMT2D (HGNC:7133)  
LAMTOR2 (HGNC:29796)  
LAT (HGNC:18874)  
LCK (HGNC:6524)  
LCT (HGNC:6530)  
LIG1 (HGNC:6598)  
LIG4 (HGNC:6601)  
LIPA (HGNC:6617)  
LPIN2 (HGNC:14450)  
LRBA (HGNC:1742)  
LRRC8A (HGNC:19027)  
LYN (HGNC:6735)  
LYST (HGNC:1968)  
MAD2L2 (HGNC:6764)  
MAGT1 (HGNC:28880)  
MALT1 (HGNC:6819)  
MAP3K14 (HGNC:6853)  
MCM4 (HGNC:6947)  
MEFV (HGNC:6998)  
MKL1 (HGNC:14334)  
MOGS (HGNC:24862)  
MPLKIP (HGNC:16002)  
MS4A1 (HGNC:7315)  
MSN (HGNC:7373)  
MTHFD1 (HGNC:7432)  
MVK (HGNC:7530)  
MYD88 (HGNC:7562)  
MYO5B (HGNC:7603)  
MYSM1 (HGNC:29401)  
NBAS (HGNC:15625)  
NBN (HGNC:7652)

NCF2 (HGNC:7661)  
NCF4 (HGNC:7662)  
NCKAP1L (HGNC:4862)  
NCSTN (HGNC:17091)  
NEUROG3 (HGNC:13806)  
NFAT5 (HGNC:7774)  
NFE2L2 (HGNC:7782)  
NFKB1 (HGNC:7794)  
NFKB2 (HGNC:7795)  
NFKBIA (HGNC:7797)  
NHEJ1 (HGNC:25737)  
NHP2 (HGNC:14377)  
NLRC4 (HGNC:16412)  
NLRP1 (HGNC:14374)  
NLRP12 (HGNC:22938)  
NLRP3 (HGNC:16400)  
NOD2 (HGNC:5331)  
NOP10 (HGNC:14378)  
NSMCE3 (HGNC:7677)  
OAS1 (HGNC:8086)  
ORAI1 (HGNC:25896)  
OSTM1 (HGNC:21652)  
OTULIN (HGNC:25118)  
PARN (HGNC:8609)  
PAX1 (HGNC:8615)  
PEPD (HGNC:8840)  
PGM3 (HGNC:8907)  
PIK3CD (HGNC:8977)  
PIK3R1 (HGNC:8979)  
PLCG2 (HGNC:9066)  
PLVAP (HGNC:13635)  
PMM2 (HGNC:9115)  
PNLIP (HGNC:9155)  
PNP (HGNC:7892)  
POLA1 (HGNC:9173)  
POLD1 (HGNC:9175)  
POLD2 (HGNC:9176)  
POLE (HGNC:9177)  
POLE2 (HGNC:9178)  
POLR3A (HGNC:30074)  
POLR3F (HGNC:15763)  
POMP (HGNC:20330)  
PRF1 (HGNC:9360)  
PRKCD (HGNC:9399)  
PRKDC (HGNC:9413)  
PSENFEN (HGNC:30100)  
PSMA3 (HGNC:9532)  
PSMB4 (HGNC:9541)  
PSMB8 (HGNC:9545)  
PSMG2 (HGNC:24929)  
PSTPIP1 (HGNC:9580)  
PTPRC (HGNC:9666)  
RAB27A (HGNC:9766)  
RAC2 (HGNC:9802)  
RAG1 (HGNC:9831)  
RAG2 (HGNC:9832)  
RANBP2 (HGNC:9848)  
RASGRP1 (HGNC:9878)  
RBCK1 (HGNC:15864)  
REL (HGNC:9954)  
RELA (HGNC:9955)  
RELB (HGNC:9956)  
RFWD3 (HGNC:25539)  
RFX5 (HGNC:9986)  
RFXANK (HGNC:9987)  
RFXAP (HGNC:9988)  
RHOH (HGNC:686)  
RIPK1 (HGNC:10019)  
RMRP (HGNC:10031)  
RNASEH2A (HGNC:18518)  
RNASEH2B (HGNC:25671)  
RNASEH2C (HGNC:24116)  
RNF113A (HGNC:12974)  
RNF168 (HGNC:26661)  
RNF31 (HGNC:16031)  
RNU4ATAC (HGNC:34016)  
RORC (HGNC:10260)  
RPSA (HGNC:6502)  
RTEL1 (HGNC:15888)  
SAMMD9 (HGNC:1348)  
SAMMD9L (HGNC:1349)  
SAMHD1 (HGNC:15925)

SAR1B (HGNC:10535)  
SCO2 (HGNC:10604)  
SEC61A1 (HGNC:18276)  
SEMA3E (HGNC:10727)  
SERPING1 (HGNC:1228)  
SGPL1 (HGNC:10817)  
SH2D1A (HGNC:1082)  
SH3BP2 (HGNC:10825)  
SH3KBP1 (HGNC:13867)  
SI (HGNC:10856)  
SIAE (HGNC:18187)  
SKIV2L (HGNC:10898)  
SLC10A2 (HGNC:10906)  
SLC26A3 (HGNC:3018)  
SLC29A3 (HGNC:23096)  
SLC35C1 (HGNC:20197)  
SLC37A4 (HGNC:4061)  
SLC39A7 (HGNC:4927)  
SLC46A1 (HGNC:30521)  
SLC51B (HGNC:29956)  
SLC5A1 (HGNC:11036)  
SLC7A7 (HGNC:11065)  
SLC9A3 (HGNC:11073)  
SLX4 (HGNC:23845)  
SMARCA1 (HGNC:11102)  
SMARCD2 (HGNC:11107)  
SNX10 (HGNC:14974)  
SP110 (HGNC:5401)  
SPINK5 (HGNC:15464)  
SPINT2 (HGNC:11247)  
SPPL2A (HGNC:30227)  
SRP54 (HGNC:11301)  
SRP72 (HGNC:11303)  
STAT1 (HGNC:11362)  
STAT2 (HGNC:11363)  
STAT3 (HGNC:11364)  
STAT4 (HGNC:11365)  
STAT5B (HGNC:11367)  
STIM1 (HGNC:11386)  
STK4 (HGNC:11408)  
STN1 (HGNC:26200)  
STX11 (HGNC:11429)  
STX3 (HGNC:11438)  
STXBP2 (HGNC:11445)  
TAOK2 (HGNC:16835)  
TAP1 (HGNC:43)  
TAP2 (HGNC:44)  
TAPBP (HGNC:11566)  
TAZ (HGNC:11577)  
TBX1 (HGNC:11592)  
TCF3 (HGNC:11633)  
TCIRG1 (HGNC:11647)  
TCN2 (HGNC:11653)  
TERC (HGNC:11727)  
TERT (HGNC:11730)  
TFRC (HGNC:11763)  
TGFB1 (HGNC:11766)  
TGFB1 (HGNC:11772)  
TGFB2 (HGNC:11773)  
THBD (HGNC:11784)  
TICAM1 (HGNC:18348)  
TIMM50 (HGNC:23656)  
TINF2 (HGNC:11824)  
TLR3 (HGNC:11849)  
TLR7 (HGNC:15631)  
TMC6 (HGNC:18021)  
TMC8 (HGNC:20474)  
TMEM173 (HGNC:27962)  
TMPRSS15 (HGNC:9490)  
TNFAIP3 (HGNC:11896)  
TNFRSF11A (HGNC:11908)  
TNFRSF13B (HGNC:18153)  
TNFRSF13C (HGNC:17755)  
TNFRSF1A (HGNC:11916)  
TNFRSF4 (HGNC:11918)  
TNFRSF6B (HGNC:11921)  
TNFRSF9 (HGNC:11924)  
TNFSF11 (HGNC:11926)  
TNFSF12 (HGNC:11927)  
TONSL (HGNC:7801)  
TOP2B (HGNC:11990)  
TP63 (HGNC:15979)

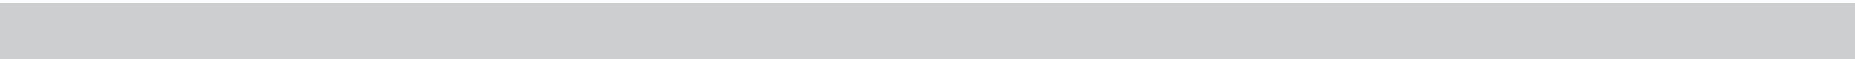

|  |  |  |  |  |                                                                                                                                                                                                                                                                                                                                                                                                                                                                                                                                                                                                                                                                                                                                                                          |
|--|--|--|--|--|--------------------------------------------------------------------------------------------------------------------------------------------------------------------------------------------------------------------------------------------------------------------------------------------------------------------------------------------------------------------------------------------------------------------------------------------------------------------------------------------------------------------------------------------------------------------------------------------------------------------------------------------------------------------------------------------------------------------------------------------------------------------------|
|  |  |  |  |  | <i>TPP2</i> (HGNC:12016)<br><i>TRAF3</i> (HGNC:12033)<br><i>TRAF3IP2</i> (HGNC:1343)<br><i>TREX1</i> (HGNC:12269)<br><i>TRNT1</i> (HGNC:17341)<br><i>TTC37</i> (HGNC:23639)<br><i>TTC7A</i> (HGNC:19750)<br><i>TYK2</i> (HGNC:12440)<br><i>UNC13D</i> (HGNC:23147)<br><i>UNC45A</i> (HGNC:30594)<br><i>UNC93B1</i> (HGNC:13481)<br><i>UNG</i> (HGNC:12572)<br><i>USB1</i> (HGNC:25792)<br><i>VAV1</i> (HGNC:12657)<br><i>VPS13B</i> (HGNC:2183)<br><i>VPS45</i> (HGNC:14579)<br><i>WAS</i> (HGNC:12731)<br><i>WDR1</i> (HGNC:12754)<br><i>WIPF1</i> (HGNC:12736)<br><i>WNT2B</i> (HGNC:12781)<br><i>WRAP53</i> (HGNC:25522)<br><i>XIAP</i> (HGNC:592)<br><i>ZAP70</i> (HGNC:12858)<br><i>ZBTB24</i> (ZNF450)<br><i>ZCCHC8</i> (HGNC:25265)<br><i>ZNF341</i> (HGNC:15992) |
|--|--|--|--|--|--------------------------------------------------------------------------------------------------------------------------------------------------------------------------------------------------------------------------------------------------------------------------------------------------------------------------------------------------------------------------------------------------------------------------------------------------------------------------------------------------------------------------------------------------------------------------------------------------------------------------------------------------------------------------------------------------------------------------------------------------------------------------|

Journal Pre-proof
